# Supplementary material for: Global Migration Dynamics Underlie Evolution and Persistence of Human Influenza A (H3N2)
Source: PLOS journal article supplement (doi:10.1371/journal.ppat.1000918), 2010-05-27
Supplement: S1 (10.1371/journal.ppat.1000918.s001) [file journal.ppat.1000918.s001]

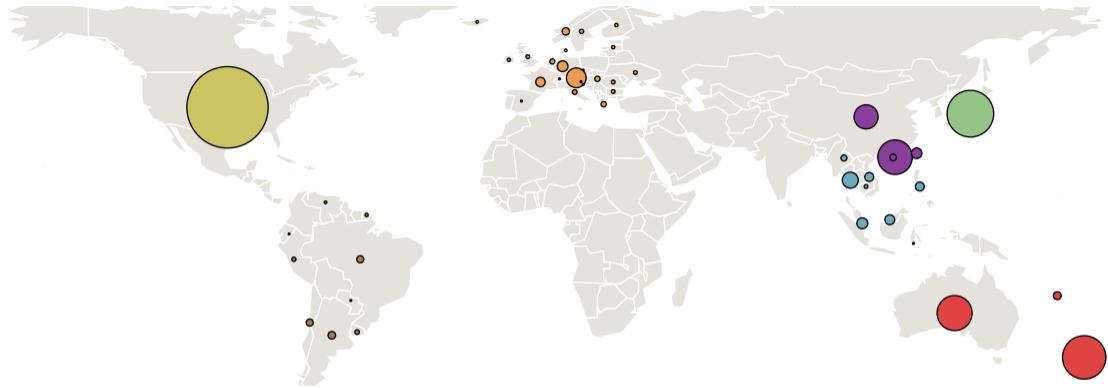

**Figure S1.** Distribution of 4355 influenza A (H3N2) samples across countries of origin. Circles are colored according to our regional partitioning. Circle areas are proportional to sample count of the full dataset before any resampling took place.
