# Supplementary material for: Global Migration Dynamics Underlie Evolution and Persistence of Human Influenza A (H3N2)
Source: PLoS Pathog. 2010 May 27;6(5):e1000918. doi: 10.1371/journal.ppat.1000918 (PMC2877742; doi:10.1371/journal.ppat.1000918)
Supplement: Table S3 — Estimates for immigration (columns) and emigration (rows) rates between each pair of regions measured in terms of migration events per lineage per year. (0.03 MB PDF) [file ppat.1000918.s005.pdf]

**Table S3.** Estimates for immigration (columns) and emigration (rows) rates between each pair of regions measured in terms of migration events per lineage per year.

|           | China          | Europe         | Japan          | Oceania        | S America      | SE Asia        | USA            |
|-----------|----------------|----------------|----------------|----------------|----------------|----------------|----------------|
| China     | —              | .07 (.03, .15) | .29 (.14, .42) | .15 (.07, .30) | .06 (.03, .10) | .30 (.11, .51) | .19 (.06, .34) |
| Europe    | .06 (.03, .13) | —              | .06 (.02, .12) | .16 (.07, .34) | .08 (.04, .13) | .11 (.05, .23) | .12 (.04, .29) |
| Japan     | .10 (.04, .30) | .07 (.03, .15) | —              | .13 (.07, .23) | .04 (.02, .08) | .10 (.04, .21) | .06 (.03, .15) |
| Oceania   | .06 (.03, .13) | .13 (.06, .22) | .07 (.03, .14) | —              | .03 (.02, .06) | .10 (.04, .25) | .16 (.05, .41) |
| S America | .04 (.02, .08) | .05 (.03, .10) | .04 (.02, .07) | .08 (.04, .14) | —              | .04 (.02, .06) | .05 (.02, .10) |
| SE Asia   | .27 (.11, .49) | .14 (.06, .25) | .13 (.05, .28) | .23 (.11, .42) | .03 (.02, .07) | —              | .11 (.05, .26) |
| USA       | .25 (.10, .47) | .25 (.13, .35) | .19 (.06, .34) | .51 (.20, .89) | .22 (.17, .27) | .20 (.08, .41) | —              |

Estimates represent means and 95% confidence intervals across 100 resampled replicates.

Sampling was constrained to 61 sequences per deme taken between the years 2002 and 2008.

Migration rates were given an exponential prior with a mean of 0.1 substitutions per site.
