# Supplementary material for: Global Migration Dynamics Underlie Evolution and Persistence of Human Influenza A (H3N2)
Source: PLoS Pathog. 2010 May 27;6(5):e1000918. doi: 10.1371/journal.ppat.1000918 (PMC2877742; doi:10.1371/journal.ppat.1000918)
Supplement: Table S4 — Estimates for the timescale of coalescence (in years) and the effective population size (in number of individuals) of each region, assuming overlapping generations and an infectious period (generation time) of 5 days. (0.04 MB PDF) [file ppat.1000918.s006.pdf]

**Table S4.** Estimates for the timescale of coalescence (in years) and the effective population size (in number of individuals) of each region, assuming overlapping generations and an infectious period (generation time) of 5 days.

|                | Timescale of coalescence | Effective population size |
|----------------|--------------------------|---------------------------|
| China          | 0.72 (0.50, 1.01)        | 105.7 (72.8, 147.4)       |
| Europe         | 1.62 (1.06, 2.23)        | 236.2 (154.9, 325.1)      |
| Japan          | 1.69 (0.93, 2.67)        | 246.4 (136.4, 389.9)      |
| Oceania        | 0.50 (0.29, 0.78)        | 72.6 (42.9, 113.4)        |
| South America  | 2.68 (2.43, 2.97)        | 391.3 (354.5, 433.3)      |
| Southeast Asia | 1.16 (0.74, 1.72)        | 168.9 (107.5, 251.1)      |
| USA            | 0.88 (0.62, 1.15)        | 128.5 (90.8, 167.4)       |

Estimates represent means and 95% confidence intervals across 100 resampled replicates. Sampling was constrained to 61 sequences per deme taken between the years 2002 and 2008. Migration rates were given an exponential prior with a mean of 0.1 substitutions per site.
