# Supplementary material for: Global Migration Dynamics Underlie Evolution and Persistence of Human Influenza A (H3N2)
Source: PLoS Pathog. 2010 May 27;6(5):e1000918. doi: 10.1371/journal.ppat.1000918 (PMC2877742; doi:10.1371/journal.ppat.1000918)
Supplement: Table S6 — Estimates using a 1000-fold larger prior for immigration (columns) and emigration (rows) rates between each pair of regions measured in terms of migration events per lineage per year. (0.03 MB PDF) [file ppat.1000918.s008.pdf]

**Table S6.** Estimates using a 1000-fold larger prior for immigration (columns) and emigration (rows) rates between each pair of regions measured in terms of migration events per lineage per year.

|           | China | Europe | Japan | Oceania | S America | SE Asia | USA  |
|-----------|-------|--------|-------|---------|-----------|---------|------|
| China     | –     | 0.32   | 1.83  | 0.39    | 0.24      | 1.93    | 0.45 |
| Europe    | 0.10  | –      | 0.31  | 0.29    | 0.38      | 0.32    | 0.21 |
| Japan     | 0.23  | 0.46   | –     | 0.28    | 0.28      | 0.68    | 0.17 |
| Oceania   | 0.14  | 0.69   | 0.40  | –       | 0.28      | 0.39    | 0.34 |
| S America | 0.08  | 0.47   | 0.29  | 0.19    | –         | 0.27    | 0.18 |
| SE Asia   | 0.35  | 0.45   | 0.91  | 0.38    | 0.28      | –       | 0.21 |
| USA       | 0.22  | 0.67   | 0.46  | 0.77    | 1.40      | 0.55    | –    |

Estimates represent means across 100 resampled replicates.

Sampling was constrained to 61 sequences per deme taken between the years 2002 and 2008.

Migration rates were given an exponential prior with a mean of 100 substitutions per site.
